# Supplementary material
Source: ML conference proceedings conference paper supplement (https://openreview.net/forum?id=8BkNZrk5Rbr)
Supplement: supplementary_material [file attachment]

Table 6: Description of all Static Features

| Number | Category                           | Name and supplementary description                                                                   | What raw data are they extracted from? | Features related to previous studies |
|--------|------------------------------------|------------------------------------------------------------------------------------------------------|----------------------------------------|--------------------------------------|
| F1     | Image feature: geometric feature   | Total length of line                                                                                 | D2 and D3                              | F1:Total length of line [26, 36, 57] |
| F2     | Image feature: statistical feature | Information entropy of image                                                                         | D1                                     |                                      |
| F3     | Image feature: geometric feature   | Area of region                                                                                       | D1                                     |                                      |
| F4     | Image feature: geometric feature   | Perimeter of region                                                                                  | D1                                     |                                      |
| F5     | Image feature: geometric feature   | Size of the minimum bounding box                                                                     | D1                                     |                                      |
| F6     | Image feature: geometric feature   | Inclination of image : the angle between the horizontal axis and the major axis of the image ellipse | D1                                     | F6:Direction of line [33,40]         |
| F7     | Image feature: geometric feature   | Eccentricity of Image                                                                                | D1                                     |                                      |
| F8     | Image feature: geometric feature   | Tilt of image : the slope between the endpoint and the starting point of line                        | D2 and D3                              | F8:Slope of line [40]                |
| F9     | Image feature: geometric feature   | Start coordinate of the image: the y-coordinate value at the starting point of the line              | D3                                     |                                      |
| F10    | Image feature: geometric feature   | End coordinate of the image: the y-coordinate value at the ending point of the line                  | D3                                     |                                      |
| F11    | Image feature: geometric feature   | Standard deviation of the curvature                                                                  | D2 and D3                              | F11:Curvature of line [18, 33, 51]   |
| F12    | Image feature: geometric feature   | Average curvature                                                                                    | D2 and D3                              |                                      |
| F13    | Image feature: geometric feature   | Curvature: average curvature $\times$ the number of bends in the line                                | D2 and D3                              |                                      |
| F14    | Image feature: shape feature       | Rectangularity                                                                                       | D1                                     |                                      |
| F15    | Image feature: shape feature       | Roundness                                                                                            | D1                                     |                                      |
| F16    | Image feature: shape feature       | Aspect ratio of bounding box                                                                         | D1                                     | F16:Aspect ratio of sample [10]      |

Table 7: Description of Time Domain Features of all Motion Features

| Number    | Category                                         | Name and supplementary description                                                     | What raw data are they extracted from? | Features related to previous studies                                                                                                                                                                                                                                                                                                                                                                                                                                                                                                                                                                                                                                                               |
|-----------|--------------------------------------------------|----------------------------------------------------------------------------------------|----------------------------------------|----------------------------------------------------------------------------------------------------------------------------------------------------------------------------------------------------------------------------------------------------------------------------------------------------------------------------------------------------------------------------------------------------------------------------------------------------------------------------------------------------------------------------------------------------------------------------------------------------------------------------------------------------------------------------------------------------|
| F17       | Time domain feature                              | Total time                                                                             | D2                                     | F17:Total drawing time [9–12, 15, 17]                                                                                                                                                                                                                                                                                                                                                                                                                                                                                                                                                                                                                                                              |
| F18       | Time domain feature                              | Average rate: total length / total time                                                | D2 and D3                              | F18:Average rate [9, 17, 26]                                                                                                                                                                                                                                                                                                                                                                                                                                                                                                                                                                                                                                                                       |
| F19       | Time domain feature                              | Maximum of velocity in the x direction - minimum of velocity in the y direction        | D2 and D4                              | F19:Maximum of velocity in x direction - minimum of velocity in the y direction [2, 10]                                                                                                                                                                                                                                                                                                                                                                                                                                                                                                                                                                                                            |
| F20       | Time domain feature                              | Maximum of acceleration in the x direction -minimum of acceleration in the y direction | D2 and D5                              | F20:Maximum of acceleration in x direction - minimum of acceleration in the y direction [2, 10]                                                                                                                                                                                                                                                                                                                                                                                                                                                                                                                                                                                                    |
| F21-F45   | Time domain feature: general statistical feature | Average                                                                                | D2-D26                                 | F26:Average of the first derivative of $x(t)$ ( Average of velocity in the x direction) [2, 9–12, 26]<br>F27:Average of the first derivative of $y(t)$ ( Average of velocity in the y direction) [2, 9–12, 26]<br>F31:Average of the second derivative of $x(t)$ ( Average of acceleration in the x direction) [9–12]<br>F32:Average of the second derivative of $y(t)$ ( Average of acceleration in the y direction) [9–12]<br>F23:Average of $p(t)$ ( Average of pressure) [2, 9, 11, 12, 15, 17, 26, 27, 57]<br>F24:Average of $alt(t)$ ( Average of altitude) [2, 11, 12]<br>F25:Average of $az(t)$ ( Average of azimuth) [2, 11, 12]                                                          |
| F46-F70   | Time domain feature: general statistical feature | Absolute Average                                                                       | D2-D26                                 |                                                                                                                                                                                                                                                                                                                                                                                                                                                                                                                                                                                                                                                                                                    |
| F71-F95   | Time domain feature: general statistical feature | Median                                                                                 | D2-D26                                 |                                                                                                                                                                                                                                                                                                                                                                                                                                                                                                                                                                                                                                                                                                    |
| F96-F120  | Time domain feature: general statistical feature | Maximum                                                                                | D2-D26                                 | F101:Maximum of the first derivative of $x(t)$ ( Maximum of velocity in the x direction) [26, 35]<br>F102:Maximum of the first derivative of $y(t)$ ( Maximum of velocity in the y direction) [26, 35]<br>F98:Maximum of $p(t)$ ( Maximum of pressure) [26, 57]                                                                                                                                                                                                                                                                                                                                                                                                                                    |
| F121-F145 | Time domain feature: general statistical feature | Minimum                                                                                | D2-D26                                 | F126:Minimum of the first derivative of $x(t)$ ( Minimum of velocity in the x direction) [9, 15, 26]<br>F127:Minimum of the first derivative of $y(t)$ ( Minimum of velocity in the y direction) [9, 15, 26]<br>F130:Minimum of the first derivative of $az(t)$ ( Minimum velocity of azimuth) [15]<br>F129:Minimum of the first derivative of $alt(t)$ ( Minimum velocity of altitude) [15]<br>F123:Minimum of $p(t)$ ( Minimum of pressure) [26, 57]                                                                                                                                                                                                                                             |
| F146-F170 | Time domain feature: general statistical feature | Difference between maximum and average                                                 | D2-D26                                 | F151:Difference between maximum andaverage of the first derivative of $x(t)$ ( Maximum of velocity in x direction - Average of velocity in the x direction [2, 10]<br>F152:Difference between maximum and average of the first derivative of $y(t)$ ( Maximum of velocity in y direction - Average of velocity in the y direction) [2, 10]<br>F156:Difference between maximum and average of the second derivative of $x(t)$ ( Maximum of acceleration in x direction-Average of acceleration in the x direction) [10]<br>F157:Difference between maximum and average of the second derivative of $y(t)$ ( Maximum of acceleration in y direction-Average of acceleration in the y direction) [10] |
| F171-F195 | Time domain feature: general statistical feature | Peak value                                                                             | D2-D26                                 |                                                                                                                                                                                                                                                                                                                                                                                                                                                                                                                                                                                                                                                                                                    |
| F196-F220 | Time domain feature: general statistical feature | Peak to peak value                                                                     | D2-D26                                 | F201:Peak to peak value of the first derivative of $x(t)$ ( Maximum of velocity in x direction-Minimum of velocity in the x direction) [10]<br>F202:Peak to peak value of the first derivative of $y(t)$ ( Maximum of velocity in y direction-Minimum of velocity in the y direction) [10]<br>F206:Peak to peak value of the second derivative of $x(t)$ ( Maximum of acceleration in x direction - Minimum of acceleration in the x direction) [10]<br>F207:Peak to peak value of the second derivative of $y(t)$ ( Maximum of acceleration in y direction - Minimum of acceleration in the y direction) [10]                                                                                     |
| F221-F245 | Time domain feature: general statistical feature | Peak-magnitude-to-RMS ratio                                                            | D2-D26                                 |                                                                                                                                                                                                                                                                                                                                                                                                                                                                                                                                                                                                                                                                                                    |
| F246-F270 | Time domain feature: general statistical feature | Mean square                                                                            | D2-D26                                 |                                                                                                                                                                                                                                                                                                                                                                                                                                                                                                                                                                                                                                                                                                    |
| F271-F295 | Time domain feature: general statistical feature | RMS                                                                                    | D2-D26                                 |                                                                                                                                                                                                                                                                                                                                                                                                                                                                                                                                                                                                                                                                                                    |
| F296-F320 | Time domain feature: general statistical feature | Square root amplitude                                                                  | D2-D26                                 |                                                                                                                                                                                                                                                                                                                                                                                                                                                                                                                                                                                                                                                                                                    |
| F321-F345 | Time domain feature: general statistical feature | Root-sum-of-squares level                                                              | D2-D26                                 |                                                                                                                                                                                                                                                                                                                                                                                                                                                                                                                                                                                                                                                                                                    |
| F346-F370 | Time domain feature: general statistical feature | Period of sequence                                                                     | D2-D26                                 |                                                                                                                                                                                                                                                                                                                                                                                                                                                                                                                                                                                                                                                                                                    |
| F371-F395 | Time domain feature: general statistical feature | Standard deviation                                                                     | D2-D26                                 | F376:Standard deviation of the first derivative of $x(t)$ ( Standard deviation of velocity in the x direction) [9]<br>F377:Standard deviation of the first derivative of $y(t)$ ( Standard deviation of velocity in the y direction) [9]<br>F371: Standard deviation of $x(t)$ [10, 12]<br>F372: Standard deviation of $y(t)$ [10–12]<br>F373: Standard deviation of $p(t)$ [9, 15, 27]                                                                                                                                                                                                                                                                                                            |
| F396-F420 | Time domain feature: general statistical feature | Variance                                                                               | D2-D26                                 |                                                                                                                                                                                                                                                                                                                                                                                                                                                                                                                                                                                                                                                                                                    |
| F421-F445 | Time domain feature: general statistical feature | abrupt changes in signals                                                              | D2-D26                                 |                                                                                                                                                                                                                                                                                                                                                                                                                                                                                                                                                                                                                                                                                                    |
| F446-F470 | Time domain feature: general statistical feature | Shape factor                                                                           | D2-D26                                 |                                                                                                                                                                                                                                                                                                                                                                                                                                                                                                                                                                                                                                                                                                    |
| F471-F495 | Time domain feature: general statistical feature | Signal to noise ratio                                                                  | D2-D26                                 |                                                                                                                                                                                                                                                                                                                                                                                                                                                                                                                                                                                                                                                                                                    |
| F496-F520 | Time domain feature: general statistical feature | Total harmonic distortion                                                              | D2-D26                                 |                                                                                                                                                                                                                                                                                                                                                                                                                                                                                                                                                                                                                                                                                                    |
| F521-F545 | Time domain feature: general statistical feature | Signal-to-noise ratio and distortion ratio                                             | D2-D26                                 |                                                                                                                                                                                                                                                                                                                                                                                                                                                                                                                                                                                                                                                                                                    |
| F546-F570 | Time domain feature: general statistical feature | Margin factor                                                                          | D2-D26                                 |                                                                                                                                                                                                                                                                                                                                                                                                                                                                                                                                                                                                                                                                                                    |
| F571-F595 | Time domain feature: general statistical feature | Impulse Factor                                                                         | D2-D26                                 |                                                                                                                                                                                                                                                                                                                                                                                                                                                                                                                                                                                                                                                                                                    |
| F596-F620 | Time domain feature: general statistical feature | Kurtosis                                                                               | D2-D26                                 |                                                                                                                                                                                                                                                                                                                                                                                                                                                                                                                                                                                                                                                                                                    |
| F621-F645 | Time domain feature: general statistical feature | Skewness                                                                               | D2-D26                                 |                                                                                                                                                                                                                                                                                                                                                                                                                                                                                                                                                                                                                                                                                                    |
| F646-F670 | Time domain feature: general statistical feature | Total number of peaks                                                                  | D2-D26                                 |                                                                                                                                                                                                                                                                                                                                                                                                                                                                                                                                                                                                                                                                                                    |
| F671-F695 | Time domain feature: general statistical feature | Zero-crossing rate                                                                     | D2-D26                                 |                                                                                                                                                                                                                                                                                                                                                                                                                                                                                                                                                                                                                                                                                                    |
| F696-F720 | Time domain feature: general statistical feature | Total number of crossing zero                                                          | D2-D26                                 | F701:Total number of crossing zero of the first derivative of $x(t)$ ( Number of reversals of velocity in the x direction) [9, 10, 17, 35]<br>F702:Total number of crossing zero of the first derivative of $y(t)$ ( Number of reversals of velocity in the y direction) [9, 10, 17, 35]<br>F706:Total number of crossing zero of the second derivative of $x(t)$ ( Number of reversals of acceleration in the x direction) [9, 35]<br>F707:Total number of crossing zero of the second derivative of $y(t)$ ( Number of reversals of acceleration in the y direction) [9, 35]                                                                                                                     |
| F721-F745 | Time domain feature: general statistical feature | Zero-crossing frequency: total number of crossing zero/total time                      | D2-D26                                 |                                                                                                                                                                                                                                                                                                                                                                                                                                                                                                                                                                                                                                                                                                    |

Table 8: Description of Frequency Domain Features of all Motion Features

| Number      | Category                                                 | Name and supplementary description | What raw data are they extracted from? | Features related to previous studies |
|-------------|----------------------------------------------------------|------------------------------------|----------------------------------------|--------------------------------------|
| F746-F870   | Frequency domain feature: general statistical feature    | Average                            | D27-D151                               | -                                    |
| F871-F995   | Frequency domain feature: general statistical feature    | Absolute Average                   | D27-D151                               | -                                    |
| F996-F1120  | Frequency domain feature: general statistical feature    | Median                             | D27-D151                               | -                                    |
| F1121-F1245 | Frequency domain feature: general statistical feature    | Maximum                            | D27-D151                               | -                                    |
| F1246-F1370 | Frequency domain feature: general statistical feature    | Minimum                            | D27-D151                               | -                                    |
| F1371-F1495 | Frequency domain feature: general statistical feature    | Peak value                         | D27-D151                               | -                                    |
| F1496-F1620 | Frequency domain feature: general statistical feature    | Peak to peak value                 | D27-D151                               | -                                    |
| F1621-F1745 | Frequency domain feature: general statistical feature    | Peak-magnitude-to-RMS ratio        | D27-D151                               | -                                    |
| F1746-F1870 | Frequency domain feature: general statistical feature    | Total number of peaks              | D27-D151                               | -                                    |
| F1871-F1995 | Frequency domain feature: general statistical feature    | Mean square                        | D27-D151                               | -                                    |
| F1996-F2120 | Frequency domain feature: general statistical feature    | RMS                                | D27-D151                               | -                                    |
| F2121-F2245 | Frequency domain feature: general statistical feature    | Standard deviation                 | D27-D151                               | -                                    |
| F2246-F2370 | Frequency domain feature: general statistical feature    | Variance                           | D27-D151                               | -                                    |
| F2371-F2495 | Frequency domain feature: general statistical feature    | Skewness                           | D27-D151                               | -                                    |
| F2496-F2620 | Frequency domain feature: general statistical feature    | Kurtosis                           | D27-D151                               | -                                    |
| F2621-F2745 | Frequency domain feature: general statistical feature    | Shape factor                       | D27-D151                               | -                                    |
| F2746-F2870 | Frequency domain feature: general statistical feature    | Gravity frequency                  | D27-D151                               | -                                    |
| F2871-F2995 | Frequency domain feature: general statistical feature    | Mean square frequency              | D27-D151                               | -                                    |
| F2996-F3120 | Frequency domain feature: general statistical feature    | Root mean square frequency         | D27-D151                               | -                                    |
| F3121-F3245 | Frequency domain feature: general statistical feature    | Frequency standard deviation       | D27-D151                               | -                                    |
| F3246-F3370 | Frequency domain feature: general statistical feature    | Frequency variance                 | D27-D151                               | -                                    |
| F3371-F3420 | Frequency domain feature: power density spectrum feature | Average frequency                  | D102-D151                              | -                                    |
| F3421-F3470 | Frequency domain feature: power density spectrum feature | Median frequency                   | D102-D151                              | -                                    |
| F3471-F3520 | Frequency domain feature: power density spectrum feature | Occupied bandwidth                 | D102-D151                              | -                                    |
| F3521-F3570 | Frequency domain feature: power density spectrum feature | Power bandwidth                    | D102-D151                              | -                                    |
| F3571-F3620 | Frequency domain feature: power density spectrum feature | Spurious free dynamic range        | D102-D151                              | -                                    |
| F3621-F3645 | Frequency domain feature: entropy feature                | Power spectral entropy             | D2-D26                                 | -                                    |
| F3646-F3670 | Frequency domain feature: entropy feature                | Energy spectral entropy            | D2-D26                                 | -                                    |
| F3671-F3695 | Frequency domain feature: entropy feature                | Singular spectral entropy          | D2-D26                                 | -                                    |
