# Supplementary material
Source: ML conference proceedings conference paper supplement (https://openreview.net/forum?id=8BkNZrk5Rbr)
Supplement: supplementary_material [file attachment]

Table 5: All Raw Data for Feature Extraction

| Number    | Category                | Description                                                                                                                            | Relationship Description                                                                   |
|-----------|-------------------------|----------------------------------------------------------------------------------------------------------------------------------------|--------------------------------------------------------------------------------------------|
| D1        | Binary image            | Binary image of this line                                                                                                              |                                                                                            |
| D2        | Time domain signal      | Horizontal position of pen tip at each moment                                                                                          |                                                                                            |
| D3        | Time domain signal      | Vertical position of pen tip at each moment                                                                                            |                                                                                            |
| D4        | Time domain signal      | Pressure of pen tip at each moment                                                                                                     |                                                                                            |
| D5        | Time domain signal      | Altitude of pen tip at each moment                                                                                                     |                                                                                            |
| D6        | Time domain signal      | Azimuth of pen tip at each moment                                                                                                      |                                                                                            |
| D7-D11    | Time domain signal      | The velocity of the pen tip in the horizontal direction / vertical direction/ pressure / altitude/ azimuth at each moment              | Take the first derivative of D2-D6 respectively                                            |
| D12-D16   | Time domain signal      | The acceleration of change of the pen tip in the horizontal direction/ vertical direction / pressure/ altitude/ azimuth at each moment | Take the second derivative of D2-D6 respectively                                           |
| D17-D21   | Time domain signal      | The jerk of change of the pen tip in the horizontal direction / vertical direction/ pressure/ altitude/ azimuth at each moment         | Take the third derivative of D2-D6 respectively                                            |
| D22-D26   | Time domain signal      | The spasm of change of the pen tip in the horizontal direction / vertical direction/ pressure/ altitude/ azimuth at each moment        | Take the fourth derivative of D2-D6 respectively                                           |
| D27-D51   | Frequency domain signal | Amplitude spectrum corresponding to all time domain signals                                                                            | Take the amplitude spectrum of D2-D26 respectively                                         |
| D52-D76   | Frequency domain signal | Energy spectrum corresponding to all time domain signals                                                                               | Take the energy spectrum of D2-D26 respectively                                            |
| D77-D101  | Frequency domain signal | Power spectrum corresponding to all time domain signals                                                                                | Take the power spectrum of D2-D26 respectively                                             |
| D102-D126 | Frequency domain signal | Power density spectrum of periodogram method corresponding to all time domain signals                                                  | Take the power density spectrum of D2-D26 by the periodogram method respectively           |
| D127-D151 | Frequency domain signal | Power density spectrum of parametric estimation method corresponding to all time domain signals                                        | Take the power density spectrum of D2-D26 by the parametric estimation method respectively |

This table describes all the raw data used for feature extraction. The features in Tables 6, 7, and 8 are all calculated based on this data.
