# Supplementary material
Source: ML conference proceedings conference paper supplement (https://openreview.net/forum?id=8BkNZrk5Rbr)
Supplement: supplementary_material [file attachment]

Table 3: Model Regression Result for the Pleasure Dimension

| Feature number | Feature name                                                                                                             | Estimate | Std.<br>Error | Wald   | df | Sig.  | 95% Confidence |                |
|----------------|--------------------------------------------------------------------------------------------------------------------------|----------|---------------|--------|----|-------|----------------|----------------|
|                |                                                                                                                          |          |               |        |    |       | Lower<br>Bound | Upper<br>Bound |
| S1(***)        | Average of $y(t)$                                                                                                        | 0.008    | 0.001         | 58.041 | 1  | 0.000 | 0.006          | 0.010          |
| S2(***)        | Inclination of the image                                                                                                 | .040     | 0.010         | 16.589 | 1  | 0.000 | 0.021          | 0.060          |
| S3(***)        | Start coordinate of the image                                                                                            | -0.003   | 0.001         | 20.962 | 1  | 0.000 | -0.005         | -0.002         |
| S4(*)          | Zero-crossing rate of velocity<br>in the x direction                                                                     | 8.859    | 3.217         | 7.584  | 1  | 0.006 | 2.554          | 15.164         |
| M1(**)         | Median of the amplitude<br>spectrum of $y(t)$                                                                            | -0.003   | 0.001         | 11.681 | 1  | 0.001 | -0.005         | -0.001         |
| M2(*)          | Gravity frequency of the power<br>density spectrum of the parametric<br>estimation method for $y(t)$                     | 7.816    | 2.663         | 8.612  | 1  | 0.003 | 2.596          | 13.037         |
| M3(*)          | Mean square of the $p(t)$<br>energy spectrum                                                                             | -0.000   | 0.000         | 9.901  | 1  | 0.002 | 0.000          | 0.000          |
| M4(*)          | Spurious-free dynamic range of<br>the power density spectrum of<br>the periodogram method<br>for jerk in the x direction | 0.126    | 0.047         | 7.340  | 1  | 0.007 | 0.035          | 0.217          |
| S5(**)         | Average curvature of the image                                                                                           | -2.122   | 0.597         | 12.642 | 1  | 0.000 | -3.291         | -0.952         |
| M5(**)         | Occupied bandwidth of the power<br>density spectrum of the parametric<br>estimation methodfor spasm of pressure          | 0.054    | 0.016         | 11.399 | 1  | 0.001 | 0.023          | 0.086          |
| M6(*)          | Mean square of the energy spectrum<br>of velocity of altitude                                                            | 0.000    | 0.000         | 9.303  | 1  | 0.002 | 0.000          | 0.000          |

\* $p < 0.01$ , \*\*  $p < 0.001$ , \*\*\*  $p < 0.0001$

Table 4: Model Regression Result for the Arousal Dimension

| Feature number | Feature name                                                                                                                       | Estimate | Std.<br>Error | Wald   | df | Sig.  | 95% Confidence |                |
|----------------|------------------------------------------------------------------------------------------------------------------------------------|----------|---------------|--------|----|-------|----------------|----------------|
|                |                                                                                                                                    |          |               |        |    |       | Lower<br>Bound | Upper<br>Bound |
| S1(***)        | Average of $y(t)$                                                                                                                  | 0.007    | 0.001         | 45.432 | 1  | 0.000 | -0.009         | -0.005         |
| S3(**)         | Start coordinate of the image                                                                                                      | -0.003   | 0.001         | 13.264 | 1  | 0.000 | 0.001          | 0.004          |
| M7(***)        | Frequency standard deviation of the power density spectrum of the parametric estimation method for the velocity in the y direct    | -0.830   | 0.171         | 23.483 | 1  | 0.000 | 0.495          | 1.166          |
| S6(*)          | Rectangularity of the image                                                                                                        | -2.179   | 0.703         | 9.618  | 1  | 0.002 | 0.802          | 3.557          |
| M8(*)          | Frequency standard deviation of the power density spectrum of the parametric estimation method for the velocity in the x direction | 0.517    | 0.200         | 6.700  | 1  | 0.010 | -0.909         | -0.126         |
| S7(**)         | Skewness of $y(t)$                                                                                                                 | 0.335    | 0.098         | 11.759 | 1  | 0.001 | -0.527         | -0.144         |
| M9(*)          | Standard deviation of $al(t)$                                                                                                      | 17.027   | 6.595         | 6.665  | 1  | 0.010 | -29.953        | -4.101         |

\* $p < 0.01$ , \*\*  $p < 0.001$ , \*\*\*  $p < 0.0001$
